# Supplementary material for: Long‐term fostamatinib treatment of adults with immune thrombocytopenia during the phase 3 clinical trial program
Source: PubMed Central journal article supplement — Am J Hematol. 2019 Mar 13;94(5):546–53. doi: 10.1002/ajh.25444 (PMC6594140; doi:10.1002/ajh.25444), 2019-03-13

## Supplementary Figures

**Long-Term Fostamatinib Treatment of Adults with Immune Thrombocytopenia (ITP) during the Phase 3 Clinical Trial Program.** Bussel JB, Arnold DM, Boxer MA, Cooper N, Mayer J, Zayed H, Tong S, Duliege A. American Journal of Hematology. February 2019.

**Figure S1.** Kaplan-Meier estimate of the median duration of (a) first overall response including stable response and (b) first stable response.

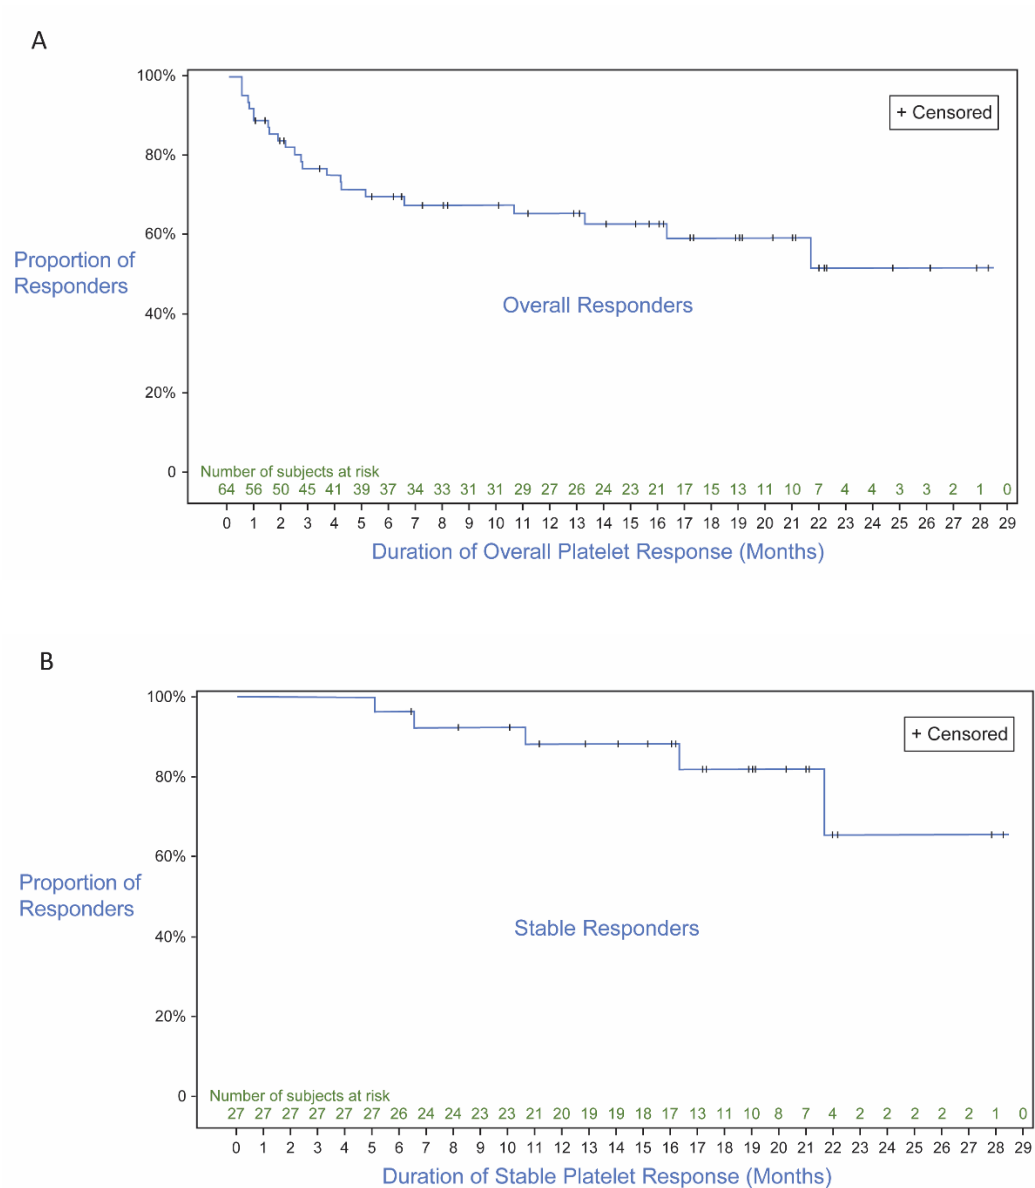

**Figure S2.** Duration of response in stable responders. Arrow at the end of each lane indicates continuation of response and/or treatment. Note: End of response defined as two platelet counts  $<50,000/\mu\text{L}$  at least 4 weeks apart (or use of rescue therapy).

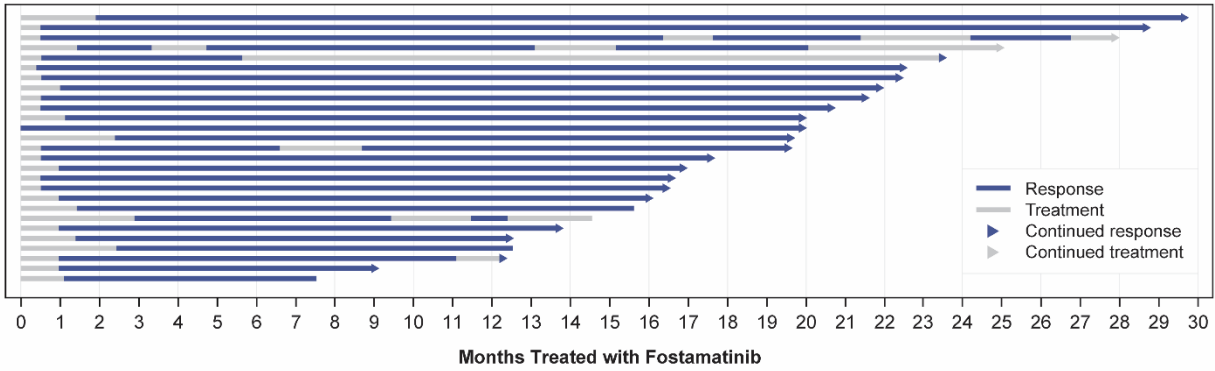

**Figure S3.** Median platelet levels over time in stable responders. Shaded area indicates timepoints with less than 10 patients contributing data.

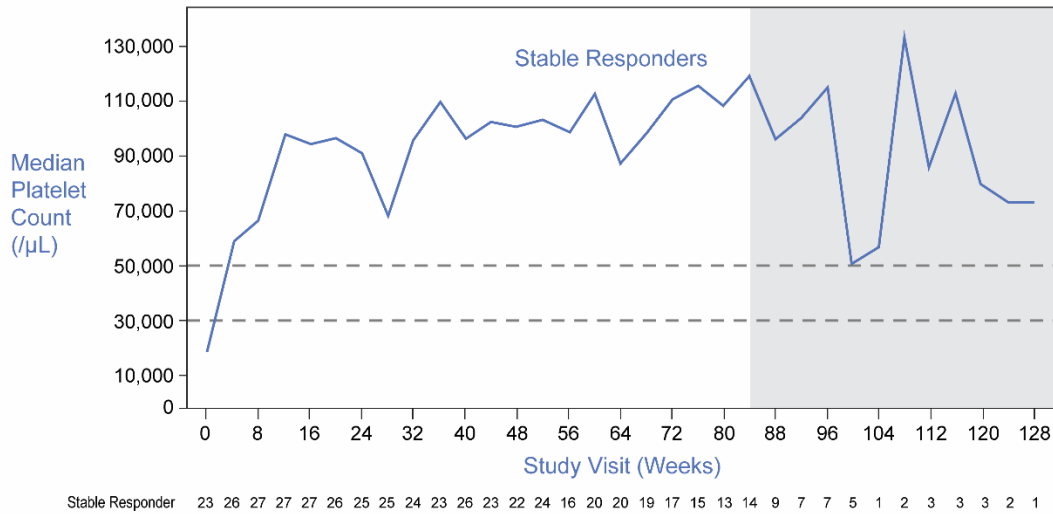

Supplement: AJH-94-546-s001.pdf [file AJH-94-546-s001.pdf]
